# Supplementary material
Source: PubMed Central journal article supplement (PMC3233914)
Supplement: Supp_Data.pdf [file Supp_Data.pdf]

## Supplementary Data

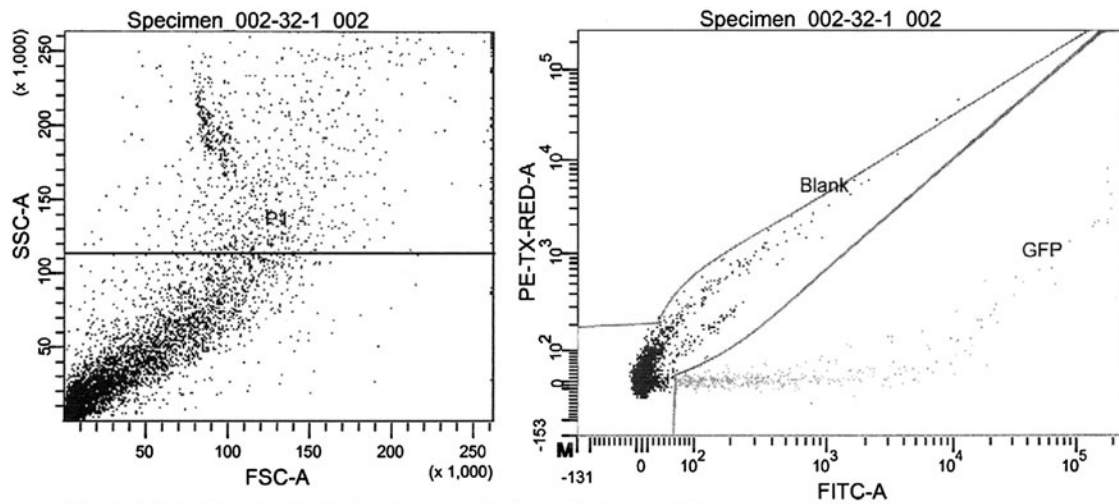

| Tube: 32   |         |         |        |
|------------|---------|---------|--------|
| Population | #Events | %Parent | %Total |
| All Events | 14,684  |         | 100.0  |
| P1         | 14,684  | 100.0   | 100.0  |
| Blank      | 14,246  | 97.0    | 97.0   |
| GFP        | 433     | 2.9     | 2.9    |

| Experiment Name: | NB (Sreeja)                          |         |                |                     |                   |
|------------------|--------------------------------------|---------|----------------|---------------------|-------------------|
| Specimen Name:   | Specimen_002                         |         |                |                     |                   |
| Tube Name:       | 32                                   |         |                |                     |                   |
| Record Date:     | Feb 24, 2011 12:07:23 PM             |         |                |                     |                   |
| \$OP:            | Administrator                        |         |                |                     |                   |
| GUID:            | 14e18f84-a451-4ad4-9b7a-145045bcc1f5 |         |                |                     |                   |
| Population       | #Events                              | %Parent | FITC-A<br>Mean | PE-TX-RED-A<br>Mean | PE-TX-RED-A<br>SD |
| All Events       | 14,684                               | ####    | 497            | 108                 | 3,385             |
| P1               | 14,684                               | 100.0   | 497            | 108                 | 3,385             |
| Blank            | 14,246                               | 97.0    | 5              | 15                  | 156               |
| GFP              | 433                                  | 2.9     | 16,636         | 3,009               | 19,336            |

**SUPPLEMENTARY FIG. S1.** FACS analysis for GFP-expressing tetherin shRNA-transfected cells. Neuroblastoma cells were cultured with turbofectin and tetherin shRNA plasmid expressing GFP, and selected in the puromycin-containing medium. The GFP-expressing cells were positively sorted and expanded separately in puromycin-supplemented medium for further studies. Tetherin shRNA plasmids were retained in neuroblastoma cells for at least nine passages.

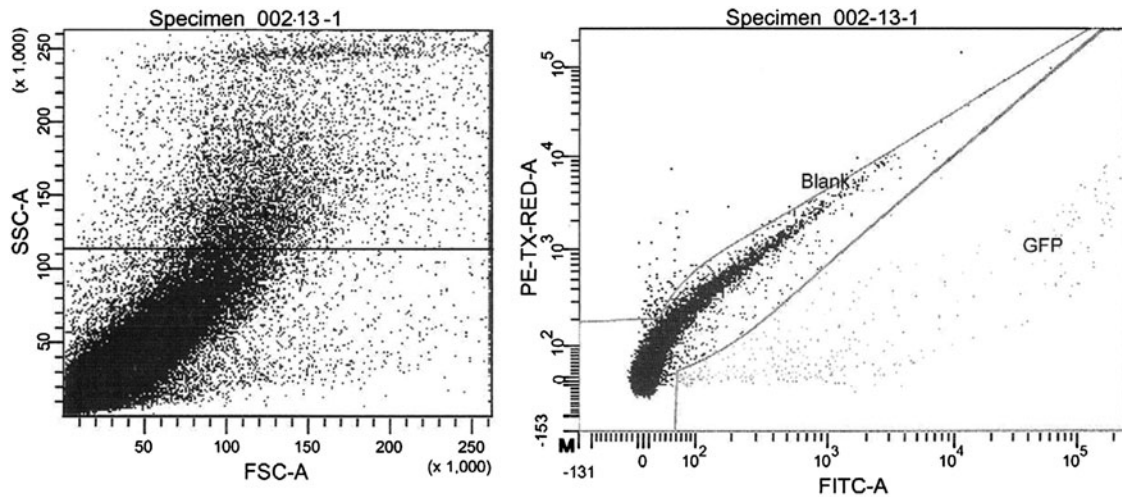

Tube: 13-1

| Population | #Events | %Parent | %Total |
|------------|---------|---------|--------|
| All Events | 138,140 |         | 100.0  |
| P1         | 138,140 | 100.0   | 100.0  |
| Blank      | 137,670 | 99.7    | 99.7   |
| GFP        | 400     | 0.3     | 0.3    |

Experiment Name: NB (Sreeja)  
 Specimen Name: Specimen\_002  
 Tube Name: 13  
 Record Date: Feb 24, 2011 12:30:09 PM  
 \$OP: Administrator  
 GUID: cddc59e1-8848-4e1e-b5c7-5a0c8acd34d0

| Population | #Events | %Parent | FITC-A Mean | PE-TX-RED-A Mean | PE-TX-RED-A SD |
|------------|---------|---------|-------------|------------------|----------------|
| All Events | 138,140 | ####    | 82          | 29               | 1,003          |
| P1         | 138,140 | 100.0   | 82          | 29               | 1,003          |
| Blank      | 137,670 | 99.7    | 7           | 22               | 326            |
| GFP        | 400     | 0.3     | 25,703      | 1,866            | 16,028         |

**SUPPLEMENTARY FIG. S2.** FACS analysis for GFP-expressing scrambled shRNA-transfected cells. Neuroblastoma cells were cultured with turbofectin and scrambled shRNA plasmid expressing GFP, and selected in the puromycin-containing medium. The GFP-expressing cells were positively sorted and expanded separately in puromycin-supplemented medium for further studies. Scrambled shRNA plasmids were retained in neuroblastoma cells for at least nine passages.
